# Supplementary material
Source: PubMed Central journal article supplement (PMC10308194)

Supplemental figure 1A. Line diagram shows consistent gestational age (mean  $\pm$  standard error) of patients operated for surgical NEC at University of Mississippi Medical Center during the years 2000-2015.

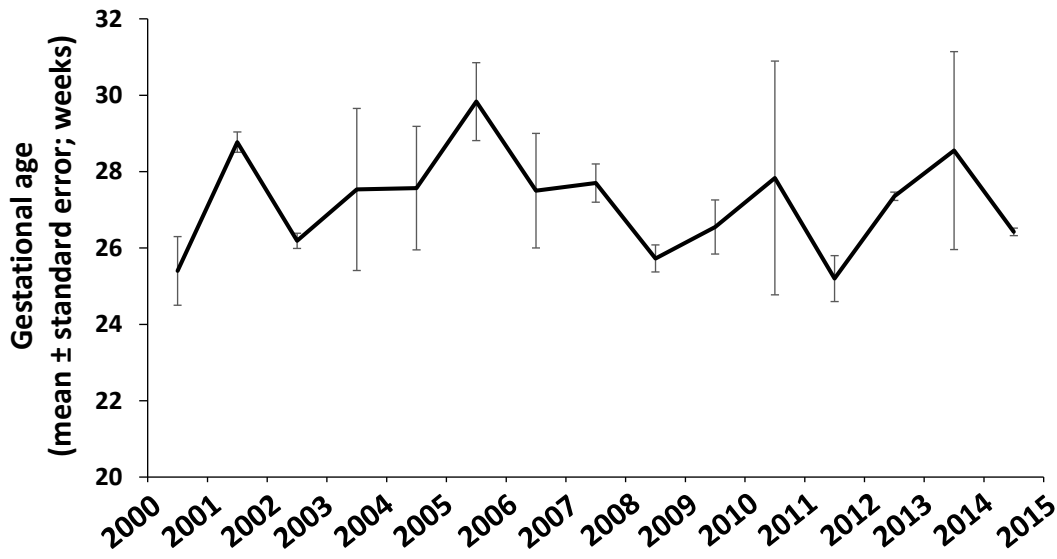

Supplemental figure 1B. Line diagram shows no significant change in the minimum gestational age of patients operated for NEC at University of Mississippi Medical Center during the years 2000-2015.

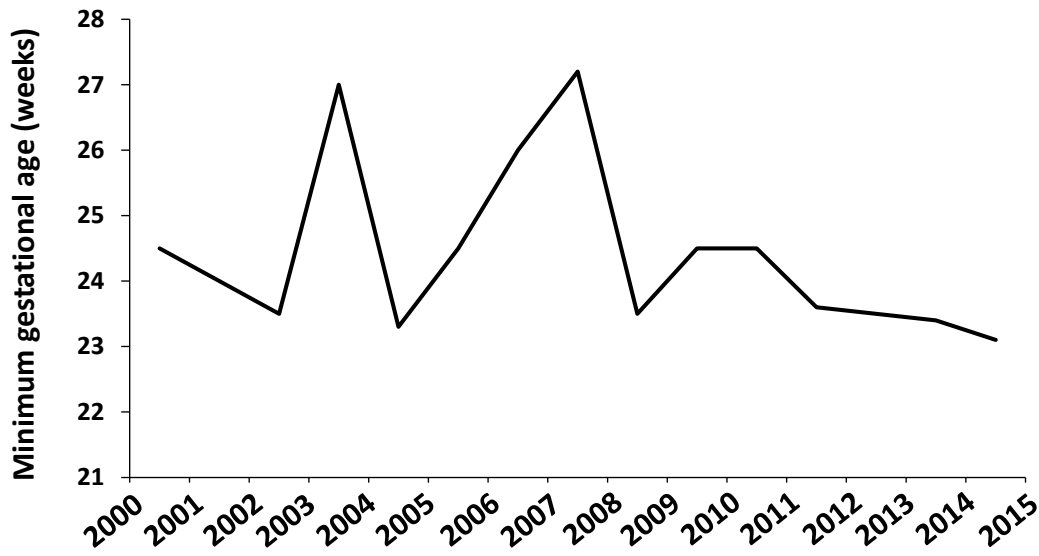

Supplement: NIHMS1910443-supplement-Supplemental_Figure_1.pdf [file NIHMS1910443-supplement-Supplemental_Figure_1.pdf]
